# Supplementary material for: Worauf es bei der Behandlung chronischer Wunden ankommt
Source: Springer Nature journal article supplement (doi:10.1007/s00058-022-2909-7), 2022-09-01
Supplement: MOESM1 [file 23439470]

## Literatur

### zum Beitrag „Worauf es bei der Behandlung chronischer Wunden ankommt“ von Astrid Probst

*Heilberufe (74) 9/2022, S. 32-33*

Atkin, L., Bucko, Z., Conde Montero, E. et al. (2019). Implementing TIMERS: the race against hard-to-heal wounds. *J Wound Care*; 28(3 Suppl 3): S 1 – S 49

Boersema, G., Smart, H., Giaquinto-Cilliers, MG. et al. (2021). Management of nonhealable and maintenance wounds: a systemic integrative review and referral pathway. *ADVANCES IN SKIN & WOUND CARE*; 34: 11 – 22

Carter, MJ., Frykberg, RG., Oropallo, A. et al. (2022). Efficacy of topical wound oxygen therapy in healing chronic diabetic foot ulcers: systemic review and meta-analysis. *ADVANCES IN WOUND CARE*; DOI:10.1089/wound.2022.0041

Chambers, AC., Leaper, DJ. (2011). Role of oxygen in wound healing: a review of evidence. *J Wound Care*; 20(4): 160 - 164

Dissemond, J., Kröger, K. für die Initiative Chronische Wunden (ICW) e.V. (Hrsg.) (2020). Chronische Wunden Diagnostik-Therapie-Versorgung. *Elsevier GmbH*

Emmert, S., Pantermehl, S., Foth, A. et al. (2021). Combining biocompatible and biodegradable scaffolds and cold atmospheric plasma for chronic wound regeneration. *International Journal of Molecular Sciences*; 22: 9199  
<https://doi.org/10.3390/ijms22179199>

Gottrup, F., Dissemond, J., Baines, J. et al. (2017). Use of oxygen therapies in wound healing with special focus on topical and hyperbaric oxygen treatment. *J Wound Care*; 26(5) (Suppl 5): S1 – S42

Pokorna, A., Holloway, S., Strohal, S. et al. (2017). Wound curriculum for nurses: post-registration qualification wound management – european qualification framework level 5. *J Wound Care*; 26(12) (Suppl 12): S 1 – S 27

Serena, T., Andersen, C., Cole, w. et al. (2022). Guidelines for the use of topical oxygen therapy in the treatment of hard-to-heal wounds based on a Delphi consensus. *J Wound Care*; 31(3) (WUWHS Suppl): S 20 – S 24

Smith, F., Sharp, a. (2019). Undertaking a person-centred assessment of patients with chronic wounds. *Nursing Standard*; doi:10.7748/ns.2019.e11305

Strohal, R., Dietrich, S., Mittlböck, M. et al. (2022). Chronic wounds treated with cold atmospheric plasmajet versus best practice wound dressings: a multicenter, randomized, non-inferiority trial. *Scientific Reports*; 12: 3645 <https://doi.org/10.1038/s41598-022-07333-x>

[www.caritasklinikum.de/data/file/default/4/38889\\_424d0ao3bea905298c7359aea9394585.pdf](http://www.caritasklinikum.de/data/file/default/4/38889_424d0ao3bea905298c7359aea9394585.pdf) Letzter Zugriff am 09.07.2022
