# Supplementary material for: Worauf es bei der Behandlung chronischer Wunden ankommt
Source: Springer Nature journal article supplement (doi:10.1007/s00058-022-2909-7), 2022-09-01
Supplement: MOESM2 [file 23439470]

## Abbildung 1

zum Beitrag „Worauf es bei der Behandlung chronischer Wunden ankommt“  
von Astrid Probst

Heilberufe (74) 9/2022, S. 32-33

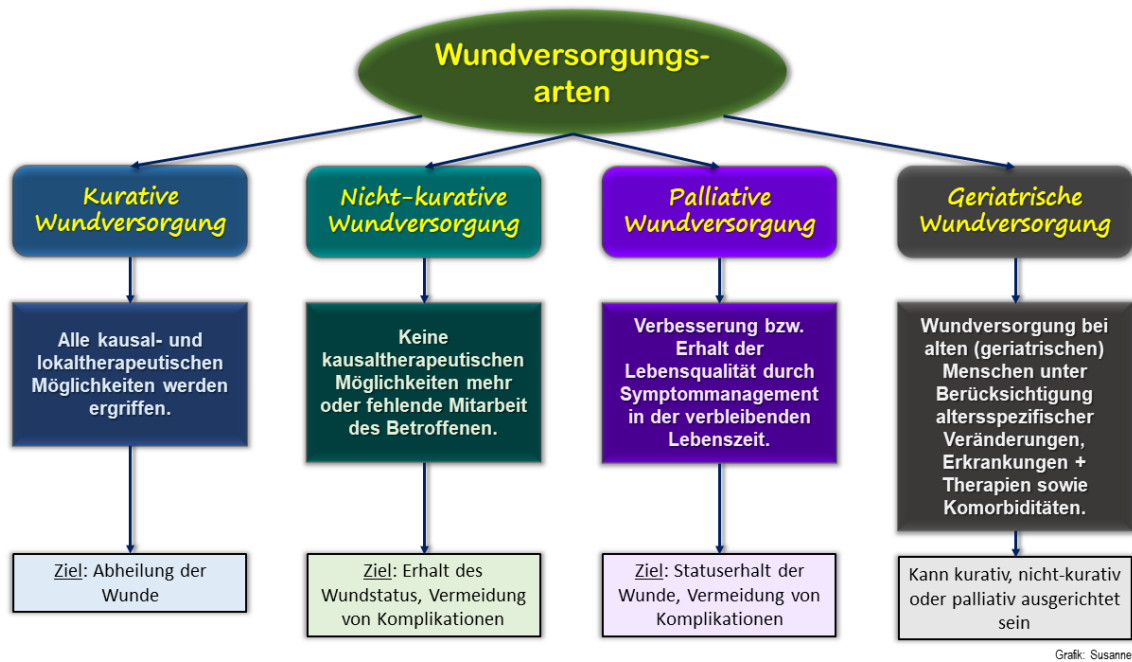

Abb. 1 mit freundlicher Genehmigung von Susanne Danzer
